# Supplementary material
Source: publisher site journal article supplement (https://www.spandidos-publications.com/1291/downloadSupplementary)

Figure S1. Negative control for immunohistochemistry staining. The negative control staining for cadherin 11 protein in gastric cancer was detected under a light microscope (magnification, x200).

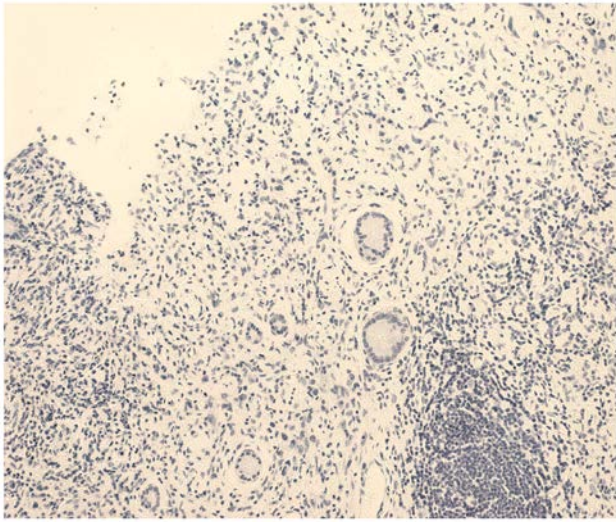

Supplement: Supplementary file 1 [file downloadSupplementary]
